# Supplementary material for: Induction of Cryptic Antifungal Pulicatin Derivatives from Pantoea Agglomerans by Microbial Co-Culture
Source: PubMed Central journal article supplement (PMC7072716; doi:10.3390/biom10020268), 2020-02-10
Supplement: biomolecules-10-00268-s001.pdf [file biomolecules-10-00268-s001.pdf]

# Supplementary Information

## Induction of cryptic antifungal pulicatin derivatives from *Pantoea agglomerans* by microbial co-culture

Bathini Thissera,<sup>1</sup> Hani A. Alhadrami,<sup>2,3,\*</sup> Marwa H.A. Hassan,<sup>4</sup> Hossam M. Hassan,<sup>4</sup> Fathy A. Behery,<sup>5,6</sup> Majed Bawzeer,<sup>1</sup> Mohammed Yaseen,<sup>1</sup> Lassaad Belbahri,<sup>7</sup> and Mostafa E. Rateb<sup>1,4,\*</sup>

<sup>1</sup> School of Computing, Engineering & Physical Sciences, University of the West of Scotland, Paisley PA1 2BE, Scotland, UK,

<sup>2</sup> Department of Medical Laboratory Technology, Faculty of Applied Medical Sciences, King Abdulaziz University, Jeddah, 21589, Saudi Arabia,

<sup>3</sup> King Fahd Medical Research Centre, King Abdulaziz University, Jeddah, 21589, Saudi Arabia,

<sup>4</sup> Department of Pharmacognosy, Faculty of Pharmacy, Beni-Suef University, Beni-Suef, 62514, Egypt

<sup>5</sup> Department of Pharmacognosy, Faculty of Pharmacy, Mansoura University, Mansoura 35516, Egypt,

<sup>6</sup> Department of Pharmacy, College of Pharmacy, Riyadh Elm University, Riyadh 11681, Saudi Arabia,

<sup>7</sup> Laboratory of Soil Biology, University of Neuchatel, 2000 Neuchatel, Switzerland.

\* Correspondence: Mostafa E. Rateb: Tel +441418483072; email [Mostafa.Rateb@uws.ac.uk](mailto:Mostafa.Rateb@uws.ac.uk); Hani A. Alhadrami: Tel +966505545275, email: [hanialhadrami@kau.edu.sa](mailto:hanialhadrami@kau.edu.sa)

Table S1. Pc LC-HRMS dereplication

| Retention time (min) | m/z [M+H] <sup>+</sup> | Molecular formula                                             | Tentative Identification                   | structure |
|----------------------|------------------------|---------------------------------------------------------------|--------------------------------------------|-----------|
| 3.46                 | 197.1293               | C <sub>10</sub> H <sub>16</sub> N <sub>2</sub> O <sub>2</sub> | cyclo(pro-val)                             |           |
| 4.28                 | 279.1159               | C <sub>17</sub> H <sub>14</sub> N <sub>2</sub> O <sub>2</sub> | dehydrocyclopeptin                         |           |
| 5.48                 | 197.1285               | C <sub>10</sub> H <sub>16</sub> N <sub>2</sub> O <sub>2</sub> | cyclo(Pro-Val)                             |           |
| 5.75                 | 166.0865               | C <sub>9</sub> H <sub>11</sub> NO <sub>2</sub>                | p-dimethylamino-benzoic acid               |           |
| 6.57                 | 225.0880               | C <sub>10</sub> H <sub>12</sub> N <sub>2</sub> O <sub>4</sub> | N-{3-Nitro-4-hydroxyphenylethyl} acetamide |           |

|      |             |                                                                |                             |  |
|------|-------------|----------------------------------------------------------------|-----------------------------|--|
| 6.57 | 324.1566    | C <sub>17</sub> H <sub>24</sub> O <sub>7</sub>                 | AF toxin 11A                |  |
| 6.59 | 324.1566    | C <sub>20</sub> H <sub>22</sub> NO                             | New hit                     |  |
| 8.17 | 254.0763    | C <sub>15</sub> H <sub>11</sub> NO <sub>3</sub>                | phomopsin A                 |  |
| 8.39 | 235.1446    | C <sub>13</sub> H <sub>18</sub> N <sub>2</sub> O <sub>2</sub>  | Fungerin                    |  |
| 9.10 | 281.1289    | C <sub>17</sub> H <sub>16</sub> N <sub>2</sub> O <sub>2</sub>  | cyclopeptin                 |  |
| 9.12 | 628.3254    | C <sub>22</sub> H <sub>45</sub> O <sub>12</sub> N <sub>9</sub> | desferrichrome              |  |
| 9.64 | 221.8219    | C <sub>12</sub> H <sub>12</sub> O <sub>4</sub>                 | Hispolon                    |  |
| 9.69 | 211.14454   | C <sub>11</sub> H <sub>18</sub> N <sub>2</sub> O <sub>2</sub>  | Cyclo(Pro-leu)              |  |
| 9.88 | 172.0427    | C <sub>7</sub> H <sub>9</sub> NO <sub>2</sub> S                | 4-methylbenzene sulfonamide |  |
| 9.69 | 311.1394958 | C <sub>18</sub> H <sub>18</sub> N <sub>2</sub> O <sub>3</sub>  | 4'-Methoxycyclopeptin       |  |
| 9.88 | 190.0323    | C <sub>10</sub> H <sub>7</sub> NOS                             | New hit                     |  |

|       |           |                                                                |                                               |                                                                                       |
|-------|-----------|----------------------------------------------------------------|-----------------------------------------------|---------------------------------------------------------------------------------------|
| 10.19 | 203.1433  | C <sub>14</sub> H <sub>18</sub> O                              | Penidienone                                   | 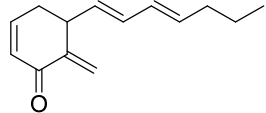   |
| 10.95 | 244.1701  | C <sub>16</sub> H <sub>21</sub> NO                             | Isochalciporon                                |    |
| 11.43 | 162.0549  | C <sub>9</sub> H <sub>7</sub> NO <sub>2</sub>                  | 7-isocyano-1-oxaspiro[4.4]nona-3,6-dien-2-one |    |
| 12.05 | 432.1598  | C <sub>22</sub> H <sub>25</sub> NO <sub>8</sub>                | Pseurotin A                                   |    |
| 12.53 | 444.22818 | C <sub>27</sub> H <sub>29</sub> N <sub>3</sub> O <sub>3</sub>  | Fructigenine                                  |    |
| 15.87 | 311.0954  | C <sub>17</sub> H <sub>14</sub> N <sub>2</sub> O <sub>4</sub>  | cyclopeniol                                   |    |
| 13.00 | 227.1018  | C <sub>11</sub> H <sub>18</sub> N <sub>2</sub> O <sub>3</sub>  | Cyclo(4-OH-pro-Leu)                           |   |
| 13.18 | 171.1380  | C <sub>10</sub> H <sub>18</sub> O <sub>2</sub>                 | 5-Decanolide                                  |  |
| 16.50 | 673.3775  | C <sub>30</sub> H <sub>52</sub> O <sub>11</sub> N <sub>6</sub> | New hit                                       |                                                                                       |
| 17.81 | 1038.6356 | C <sub>68</sub> H <sub>83</sub> O <sub>6</sub> N <sub>3</sub>  | New hit                                       |                                                                                       |

**Table S2. Pa LC-HRMS dereplication (Cherif-Silini *et al.*, 2019)**

| Rt (min) | m/z [M+H] <sup>+</sup> | Molecular formula                                             | Tentative Identification | Structure |
|----------|------------------------|---------------------------------------------------------------|--------------------------|-----------|
| 5.02     | 235.1082               | C <sub>12</sub> H <sub>14</sub> N <sub>2</sub> O <sub>3</sub> | Cyclo(Phe-Ser)           |           |
| 5.02     | 247.1083               | C <sub>13</sub> H <sub>14</sub> N <sub>2</sub> O <sub>3</sub> | N-Acetyltryptophan       |           |
| 5.10     | 261.18533              | C <sub>14</sub> H <sub>16</sub> O <sub>3</sub> N <sub>2</sub> | cyclo(Pro-Tyr)           |           |
| 5.11     | 205.0976               | C <sub>11</sub> H <sub>12</sub> N <sub>2</sub> O <sub>2</sub> | Cyclo(Gly-Phe)           |           |
| 5.20     | 217.0977               | C <sub>12</sub> H <sub>12</sub> N <sub>2</sub> O <sub>2</sub> | Sannanine                |           |
| 5.40     | 197.12887              | C <sub>10</sub> H <sub>16</sub> N <sub>2</sub> O <sub>2</sub> | cyclo(Pro-Val)           |           |
| 5.58     | 185.1287537            | C <sub>9</sub> H <sub>16</sub> N <sub>2</sub> O <sub>2</sub>  | cyclo(Ala-Leu)           |           |
| 5.80     | 227.1395645            | C <sub>11</sub> H <sub>18</sub> N <sub>2</sub> O <sub>3</sub> | cyclo-4-hydroxyPro-Leu   |           |

|       |          |                                                               |                               |                                                                                       |
|-------|----------|---------------------------------------------------------------|-------------------------------|---------------------------------------------------------------------------------------|
| 5.94  | 211.1446 | C <sub>11</sub> H <sub>18</sub> O <sub>2</sub> N <sub>2</sub> | Cyclo(Ile-Pro)                | 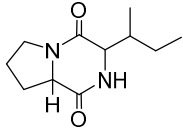   |
| 6.90  | 219.1133 | C <sub>12</sub> H <sub>14</sub> N <sub>2</sub> O <sub>2</sub> | Cyclo(Ala-Phe)                |    |
| 6.90  | 277.1551 | C <sub>15</sub> H <sub>20</sub> N <sub>2</sub> O <sub>3</sub> | cyclo(Leu-Tyr)                |    |
| 7.12  | 239.0820 | C <sub>14</sub> H <sub>10</sub> N <sub>2</sub> O <sub>2</sub> | 6-Carboxymethyl-phenazine     |    |
| 7.76  | 176.0708 | C <sub>10</sub> H <sub>9</sub> NO <sub>2</sub>                | 4-Hydroxy-N-methylcarbostyryl |    |
| 8.74  | 245.1289 | C <sub>14</sub> H <sub>16</sub> N <sub>2</sub> O <sub>2</sub> | cyclo-(Pro-phe)               |   |
| 9.69  | 311.1394 | C <sub>18</sub> H <sub>18</sub> N <sub>2</sub> O <sub>3</sub> | 4'-Methoxycyclopeptin         |  |
| 10.22 | 213.1602 | C <sub>11</sub> H <sub>20</sub> N <sub>2</sub> O <sub>2</sub> | cyclo(L-Ile-L-Valine)         |  |
| 11.48 | 178.0324 | C <sub>9</sub> H <sub>7</sub> NOS                             | 2-(2-Hydroxyphenyl)thiazole   |  |
| 11.52 | 224.0381 | C <sub>10</sub> H <sub>9</sub> NO <sub>3</sub> S              | (+)-(S)-dihydroaeruginic acid |  |
| 12.61 | 218.1182 | C <sub>13</sub> H <sub>15</sub> NO <sub>2</sub>               | New quinoline derivative      |                                                                                       |
| 12.65 | 261.1603 | C <sub>15</sub> H <sub>20</sub> N <sub>2</sub> O <sub>2</sub> | Cyclo(Leu-Phe)                |  |

|       |          |                                                                              |                                                  |                                                                                       |
|-------|----------|------------------------------------------------------------------------------|--------------------------------------------------|---------------------------------------------------------------------------------------|
| 13.18 | 214.1232 | C <sub>14</sub> H <sub>15</sub> NO                                           | New quinoline derivative                         |                                                                                       |
| 13.40 | 295.1448 | C <sub>18</sub> H <sub>18</sub> N <sub>2</sub> O <sub>2</sub>                | cyclo-(L-Phe-L-Phe)                              | 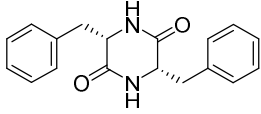   |
| 13.51 | 276.1602 | C <sub>16</sub> H <sub>21</sub> NO <sub>3</sub>                              | 3-n-Heptyl-3-hydroxy-(1H,3H)-quinoline-2,4-dione |    |
| 13.62 | 284.1651 | C <sub>18</sub> H <sub>21</sub> NO <sub>2</sub>                              | New quinoline derivative                         |                                                                                       |
| 13.98 | 244.1713 | C <sub>16</sub> H <sub>21</sub> NO                                           | 2-heptyl-4-hydroxy-quinolone                     |    |
| 14.01 | 226.1231 | C <sub>15</sub> H <sub>15</sub> NO                                           | (E)-4-Phenyl-3-(pyridine-2-yl)but-2-en-1-ol      |    |
| 14.06 | 228.1389 | C <sub>15</sub> H <sub>17</sub> NO                                           | New quinoline derivative                         |                                                                                       |
| 14.49 | 211.0872 | C <sub>13</sub> H <sub>10</sub> N <sub>2</sub> O                             | Cyanomycin                                       |  |
| 14.79 | 228.1389 | C <sub>15</sub> H <sub>17</sub> NO                                           | New quinoline derivative                         |                                                                                       |
| 14.88 | 274.1444 | C <sub>16</sub> H <sub>19</sub> NO <sub>3</sub>                              | New quinoline derivative                         |                                                                                       |
| 14.88 | 323.0530 | C <sub>14</sub> H <sub>16</sub> N <sub>2</sub> O <sub>3</sub> S <sub>2</sub> | Pyochelin                                        |  |
| 15.70 | 274.1809 | C <sub>17</sub> H <sub>23</sub> NO <sub>2</sub>                              | Lorneamide A                                     |  |
| 15.81 | 325.0679 | C <sub>14</sub> H <sub>16</sub> N <sub>2</sub> O <sub>3</sub>                | cyclo(4-OH-Pro-Phe)                              |  |
| 16.07 | 246.1494 | C <sub>15</sub> H <sub>19</sub> NO <sub>2</sub>                              | New quinoline derivative                         |                                                                                       |

|       |          |                         |                                                          |                                                                                       |
|-------|----------|-------------------------|----------------------------------------------------------|---------------------------------------------------------------------------------------|
| 16.33 | 244.1338 | $C_{15}H_{17}NO_2$      | New quinoline derivative                                 |                                                                                       |
| 16.54 | 242.1548 | $C_{16}H_{19}NO$        | 2-Heptenyl-4-quinolinone                                 | 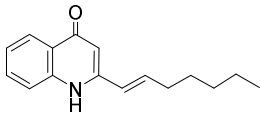   |
| 16.87 | 274.1444 | $C_{16}H_{19}NO_3$      | ε-3-(hept-1-en-1-yl)-3-hydroxyquinoline-2,4(1H,3H)-dione |    |
| 17.01 | 651.2722 | $C_{30}H_{41}O_{13}N_3$ | New hit                                                  |                                                                                       |
| 18.32 | 260.1654 | $C_{16}H_{21}NO_2$      | 2-Heptyl-3-hydroxy-4(3H)-quinolone                       |    |
| 19.43 | 272.1645 | $C_{17}H_{21}NO_2$      | New quinoline derivative                                 |                                                                                       |
| 19.14 | 272.1647 | $C_{17}H_{21}NO_2$      | New quinoline derivative                                 |                                                                                       |
| 19.19 | 274.1805 | $C_{17}H_{23}NO_2$      | 4-hydroxy-2-octylquinoline 1-oxide                       |   |
| 19.63 | 270.1861 | $C_{18}H_{23}NO$        | 2-(n-delta(1)-Nonyl)-4-oxyquinoline                      |  |
| 19.84 | 272.2017 | $C_{18}H_{25}NO$        | 1. 2-Nonyl-quinonyl-4-ol                                 |  |
| 19.7  | 358.2380 | $C_{22}H_{31}NO_3$      | New quinoline derivative                                 |                                                                                       |
| 19.93 | 356.2224 | $C_{22}H_{29}NO_3$      | New quinoline derivative                                 |                                                                                       |
| 20.15 | 277.1172 | $C_{16}H_{22}O_4$       | Oncorhyncolide                                           |  |
| 20.16 | 286.1809 | $C_{18}H_{23}NO_2$      | New quinoline derivative                                 |                                                                                       |
| 20.89 | 288.1965 | $C_{18}H_{25}NO_2$      | 4-Hydroxy-2-n-nonyl-quinoline N-oxide                    |  |

|       |           |                                                 |                                                    |                                                                                     |
|-------|-----------|-------------------------------------------------|----------------------------------------------------|-------------------------------------------------------------------------------------|
| 21.67 | 314.2118  | C <sub>20</sub> H <sub>27</sub> NO <sub>2</sub> | (Z)-4-hydroxy-2-(undec-4-en-1-yl)quinoline 1-oxide | 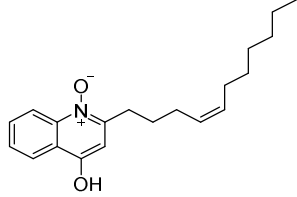 |
| 22.53 | 340.22730 | C <sub>22</sub> H <sub>29</sub> NO <sub>2</sub> | New quinoline derivative                           |                                                                                     |

Table S3. Pa-Pc LC-HRMS dereplication

| Retention time (min) | m/z [M+H] <sup>+</sup> | Molecular formula                                               | Tentative Identification | structure                                                                             |
|----------------------|------------------------|-----------------------------------------------------------------|--------------------------|---------------------------------------------------------------------------------------|
| 5.41                 | 197.1274               | C <sub>10</sub> H <sub>16</sub> O <sub>2</sub> N <sub>2</sub>   | cyclo( pro-Val)          | 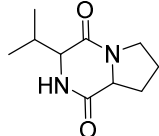  |
| 7.31                 | 684.3877               | C <sub>30</sub> H <sub>53</sub> N <sub>9</sub> O <sub>7</sub> S | New hit                  |                                                                                       |
| 7.35                 | 206.993                | C <sub>10</sub> H <sub>7</sub> NO <sub>2</sub> S                | Aeruginaldehyde          |  |
| 8.06                 | 560.26715              | C <sub>22</sub> H <sub>37</sub> O <sub>10</sub> N <sub>7</sub>  | New hit                  |                                                                                       |
| 9.15                 | 628.3254               | C <sub>22</sub> H <sub>45</sub> O <sub>12</sub> N <sub>9</sub>  | Desferrichrome           |  |
| 9.32                 | 221.0385               | C <sub>10</sub> H <sub>8</sub> O <sub>2</sub> N <sub>2</sub> S  | Pulicatin F              |  |
| 9.41                 | 264.0695               | C <sub>13</sub> H <sub>13</sub> NO <sub>5</sub> S               | New hit                  |                                                                                       |
| 9.45                 | 293.14984              | C <sub>15</sub> H <sub>20</sub> O <sub>4</sub> N <sub>2</sub>   | 5Z-Bripiodionen          |  |



|       |          |                                                               |                              |  |
|-------|----------|---------------------------------------------------------------|------------------------------|--|
| 11.74 | 229.1552 | C <sub>11</sub> H <sub>20</sub> O <sub>3</sub> N <sub>2</sub> | Libramycin A                 |  |
| 12.86 | 246.0519 | C <sub>13</sub> H <sub>11</sub> NO <sub>2</sub> S             | New hit                      |  |
| 13.12 | 227.1018 | C <sub>11</sub> H <sub>18</sub> N <sub>2</sub> O <sub>3</sub> | Cyclo(4-OH-pro-Leu)          |  |
| 13.87 | 244.1713 | C <sub>16</sub> H <sub>21</sub> NO                            | 2-heptyl-4-hydroxy-quinolone |  |

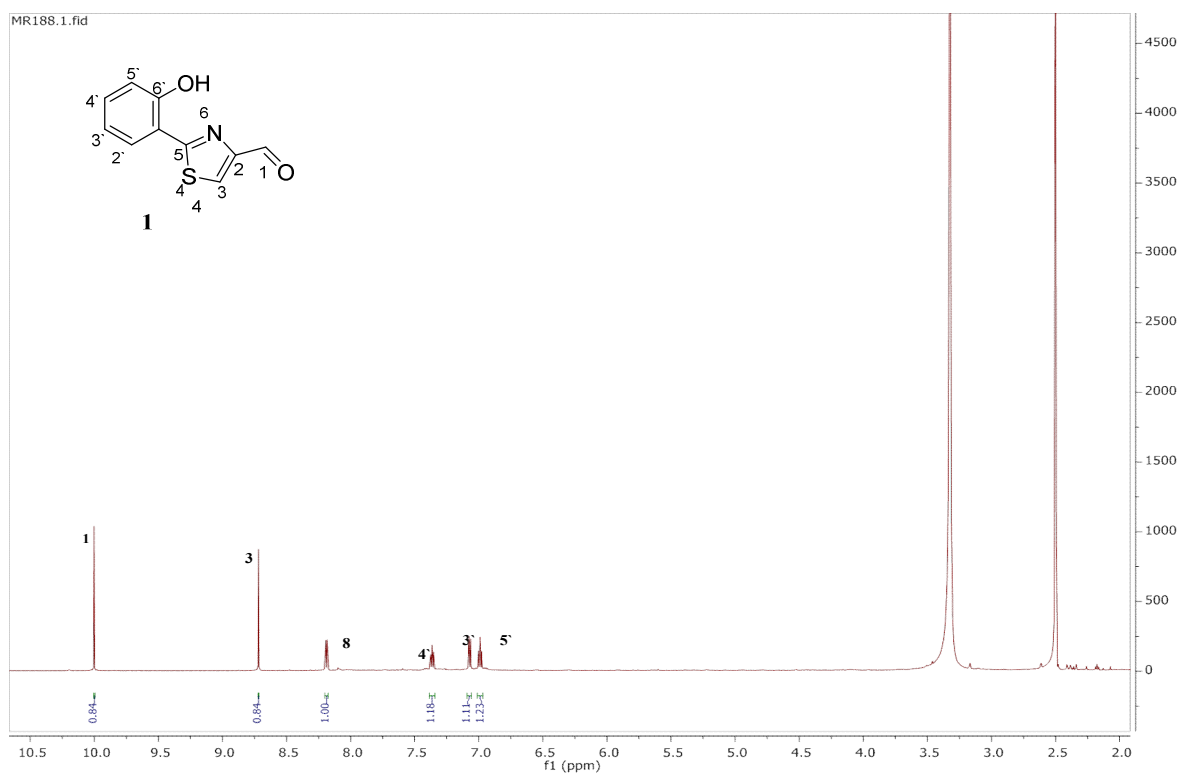

Figure S1. <sup>1</sup>H NMR spectrum of compound **1**.

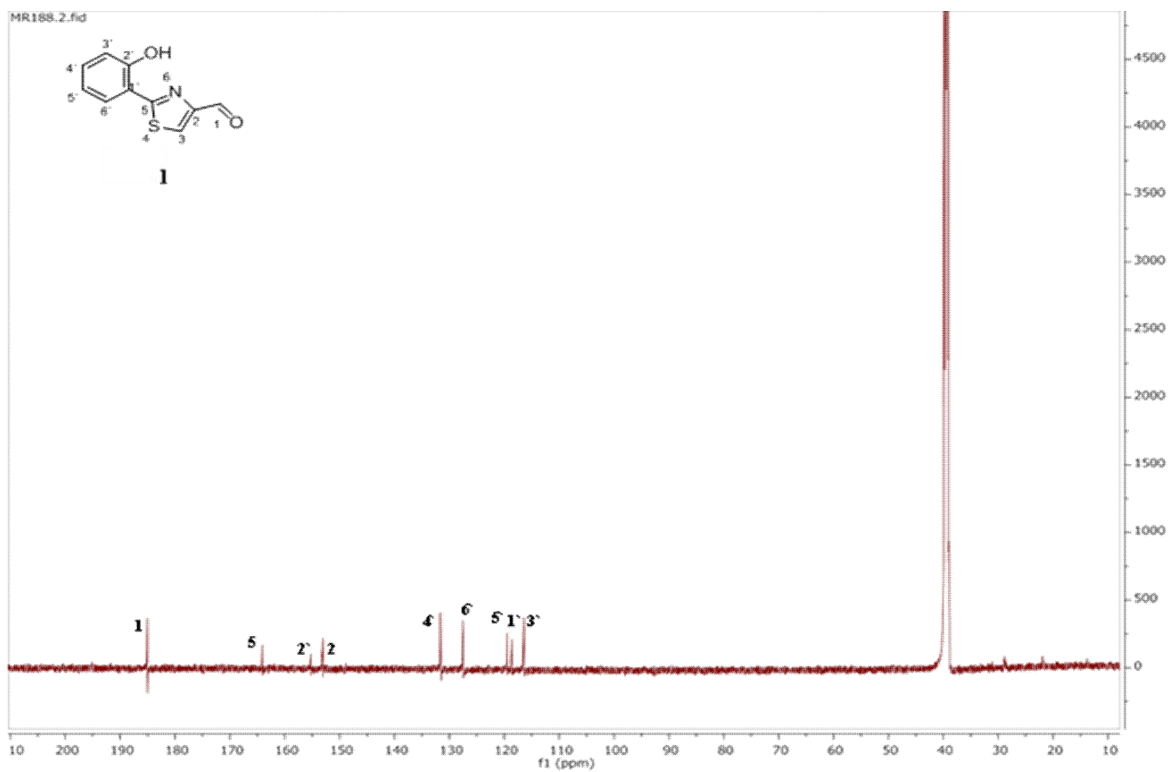

Figure S 2.  $^{13}\text{C}$  NMR spectrum of Compound 1.

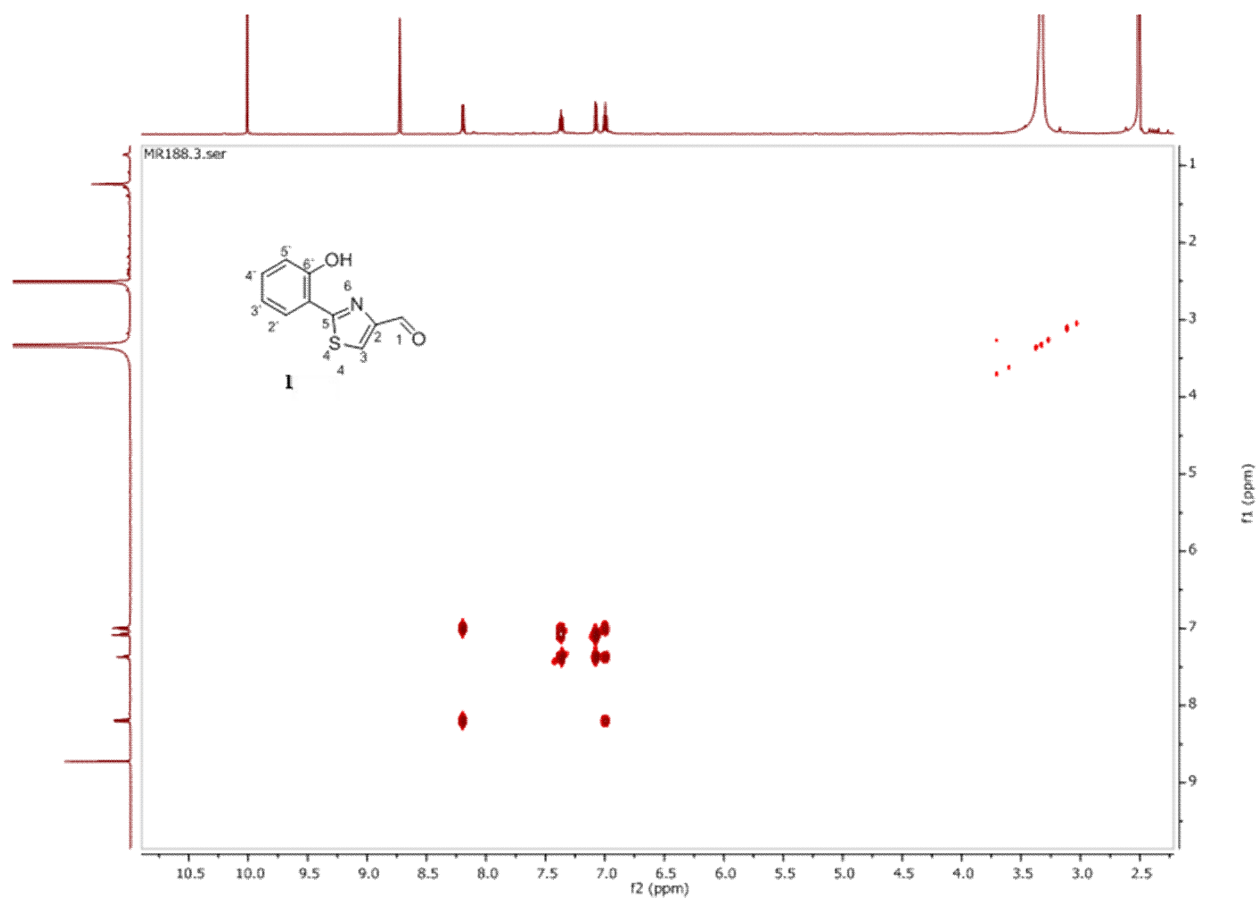

Figure S3. COSY spectrum of compound 1

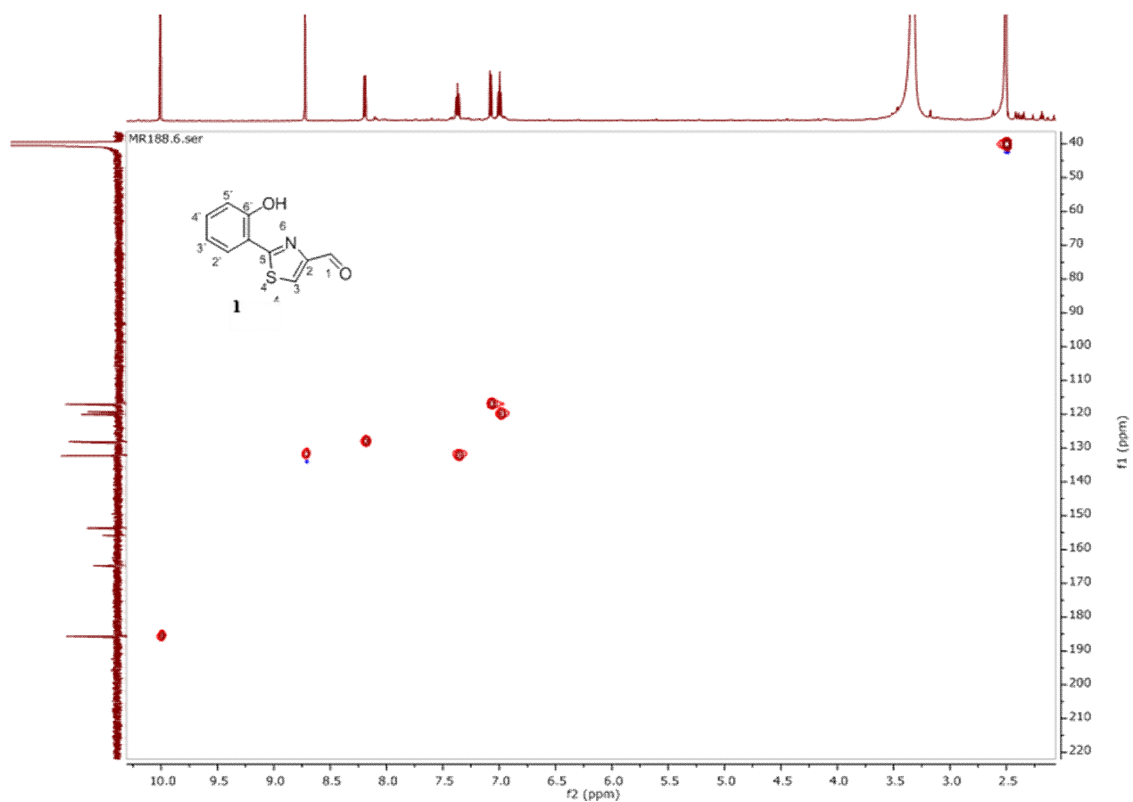

Figure S4. HSQC spectrum of compound 1

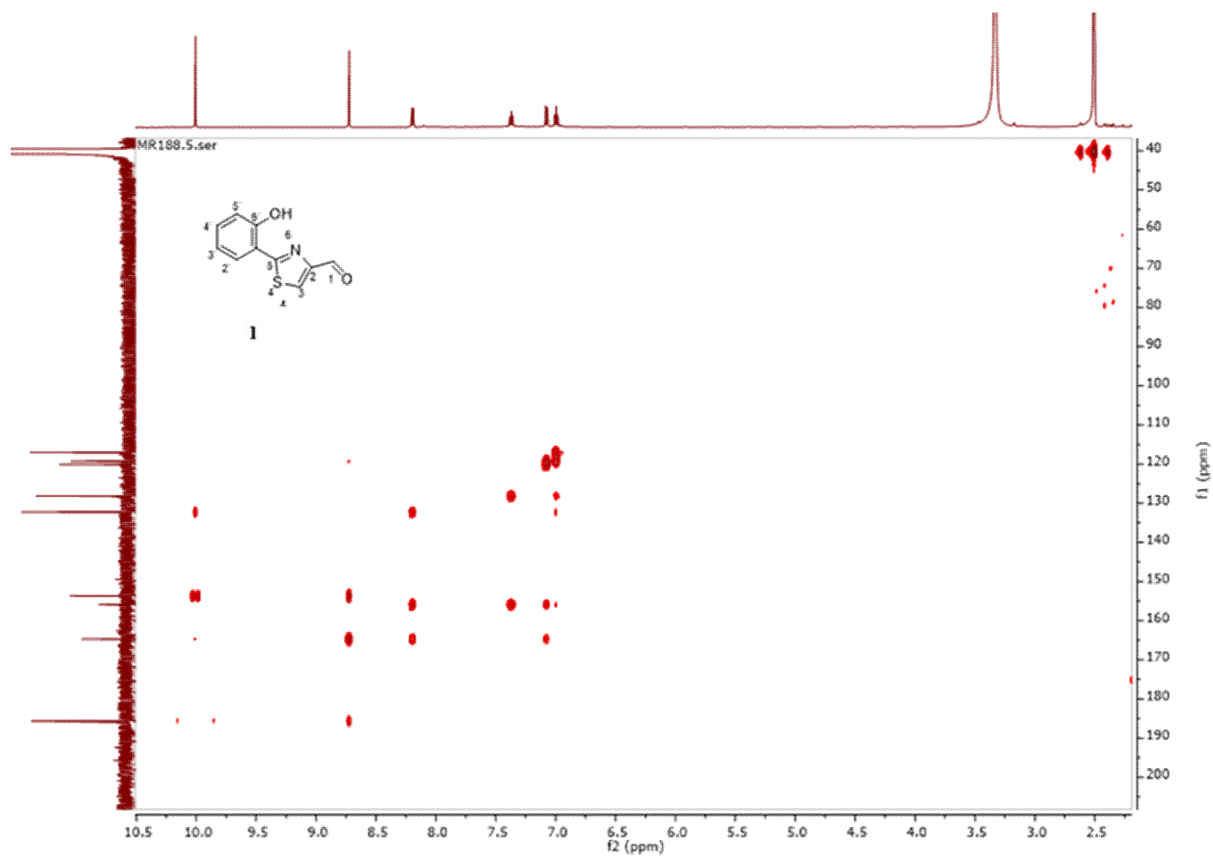

Figure S5. HMBC spectrum of compound 1

MR188 #682 RT: 13.12 AV: 1 NL: 5.98E3  
T: FTMS + p ESI Full ms [150.00-2000.00]

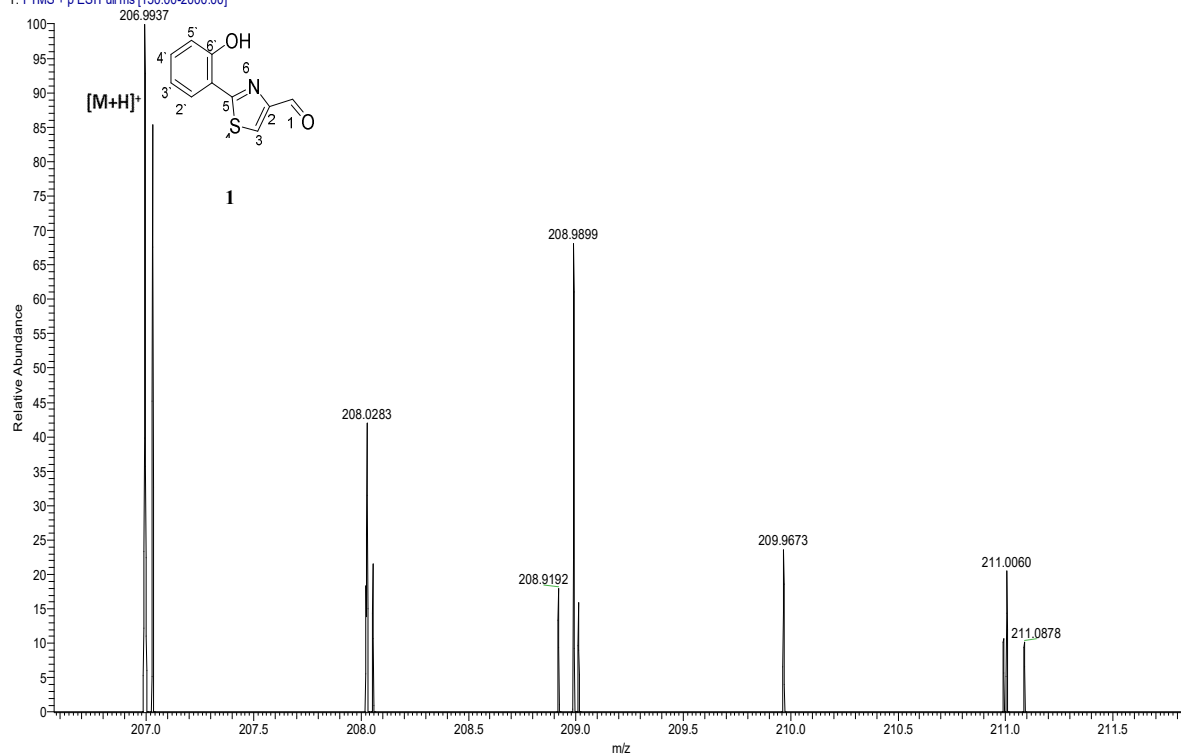

Figure S6. HRESIMS spectrum of compound 1

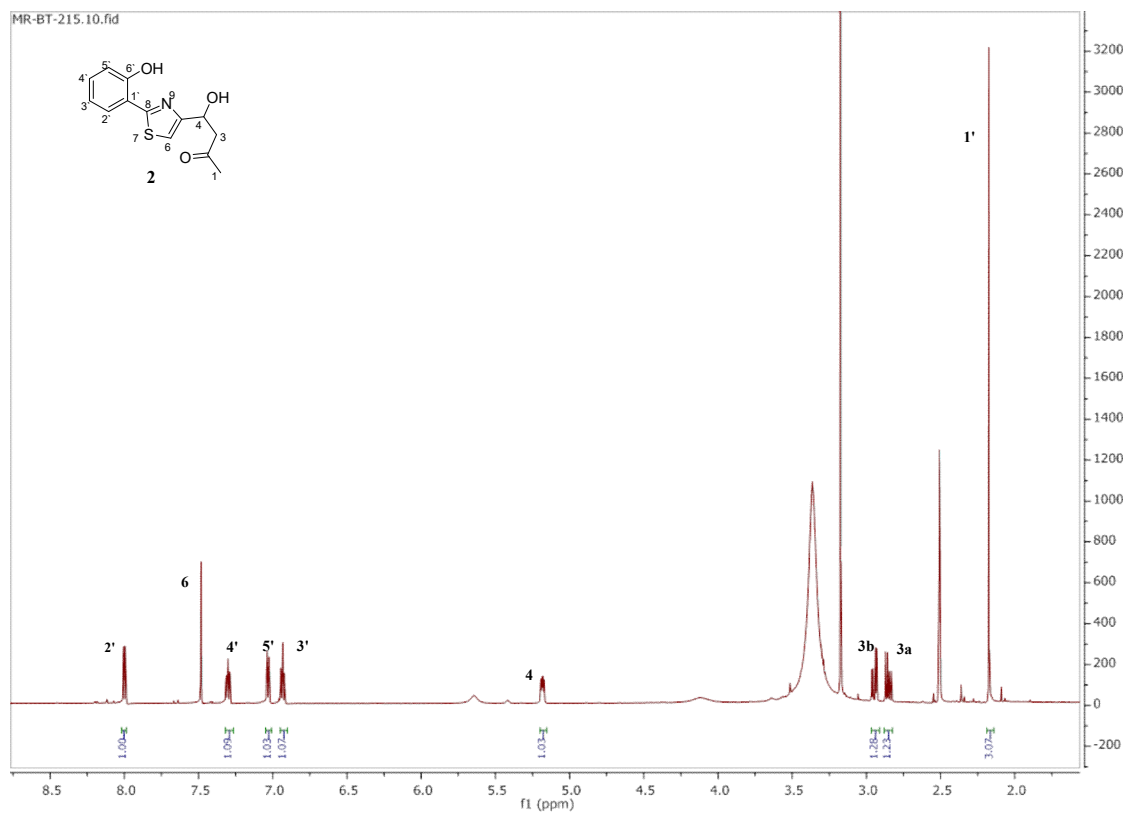

Figure S7. <sup>1</sup>H NMR spectrum of compound 2.

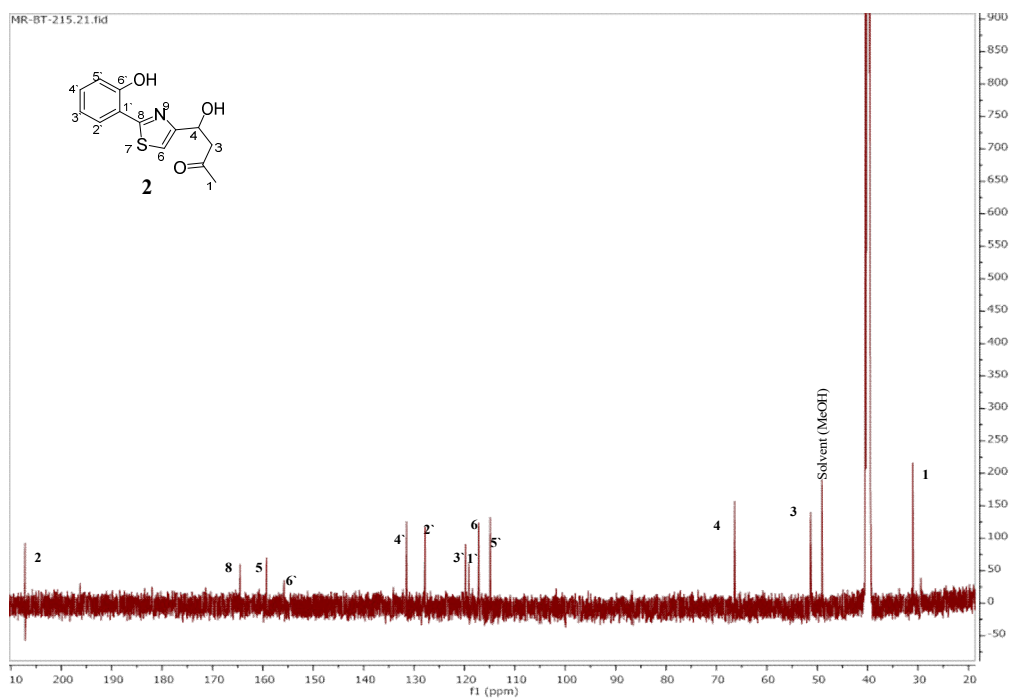

Figure S8.  $^{13}\text{C}$  NMR spectrum of compound 2.

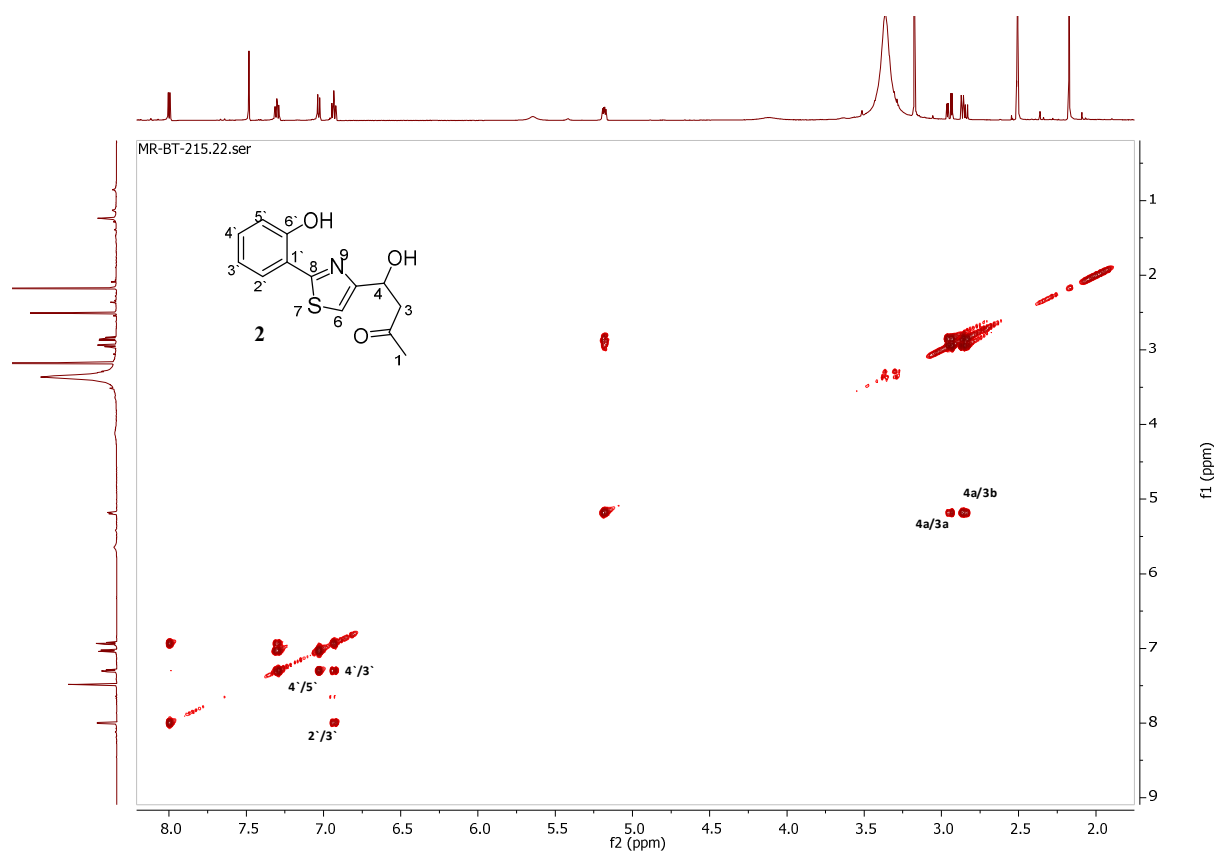

Figure S9. COSY spectrum of compound 2

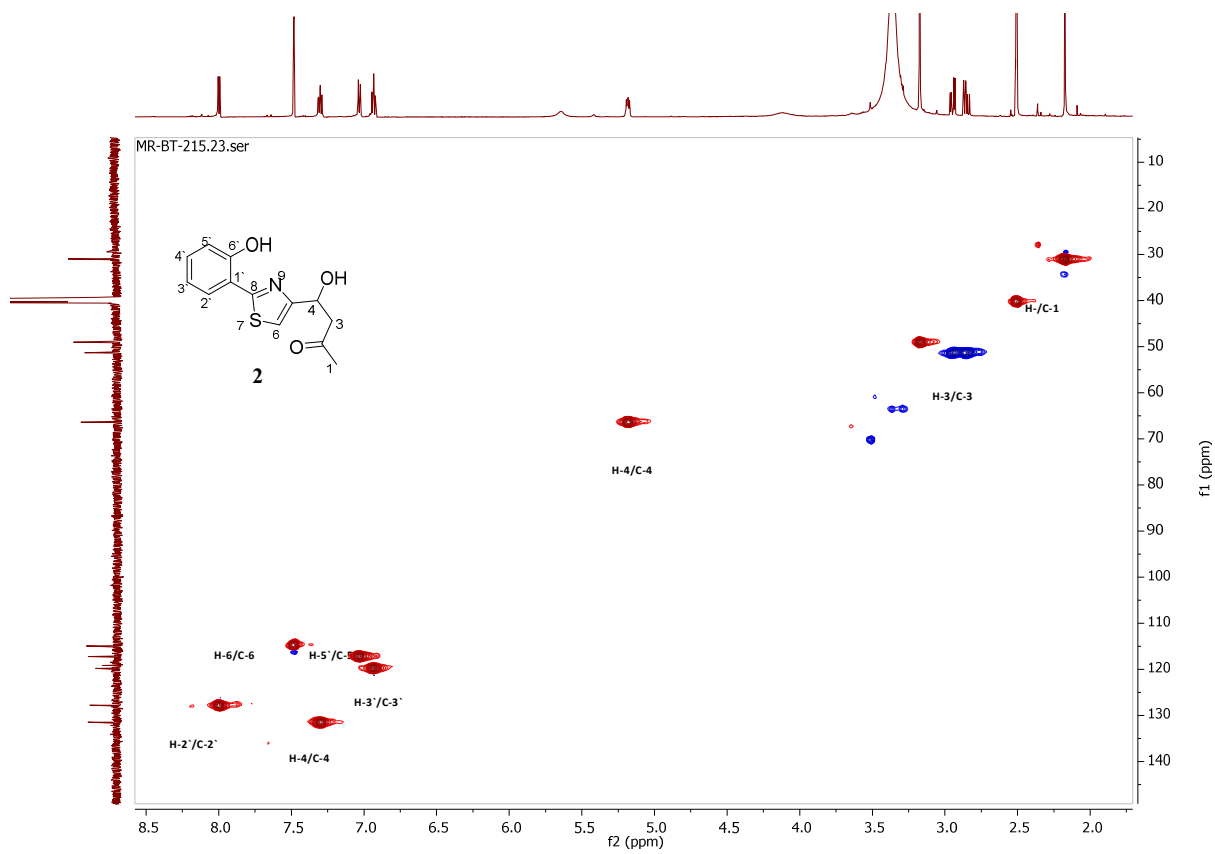

Figure S10. HSQC spectrum of compound 2

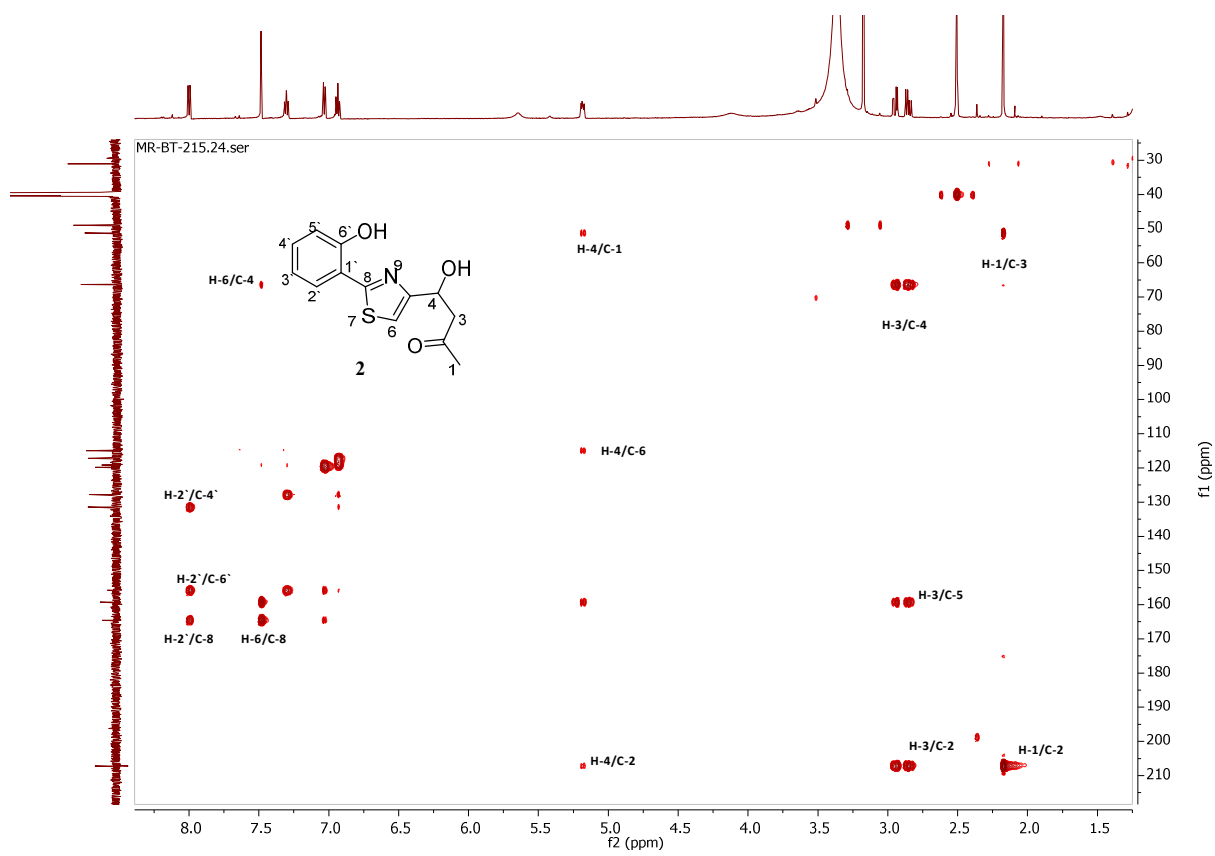

Figure S11. HMBC spectrum of compound 2.

MR484 #1025 RT: 9.82 AV: 1 NL: 4.13E6  
T: FTMS + p ESI Full ms [230.00-2000.00]

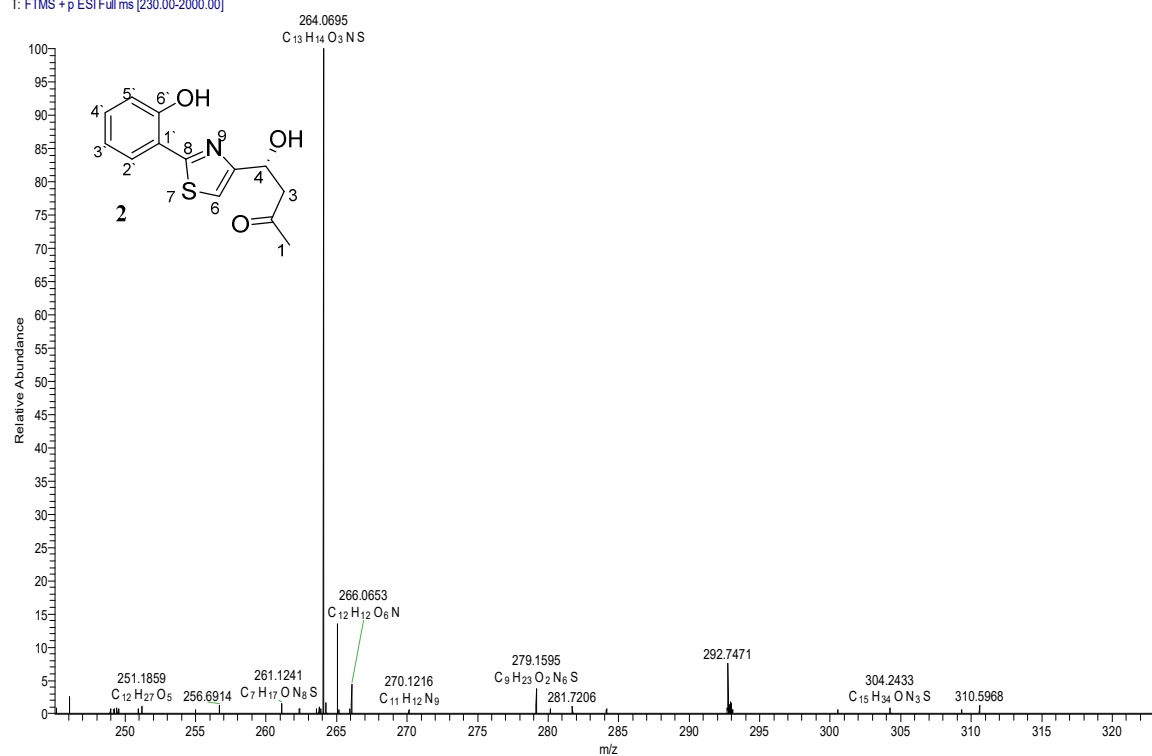

Figure S12. HRMS spectrum of compound 2.

MR-BT-225.20.fid

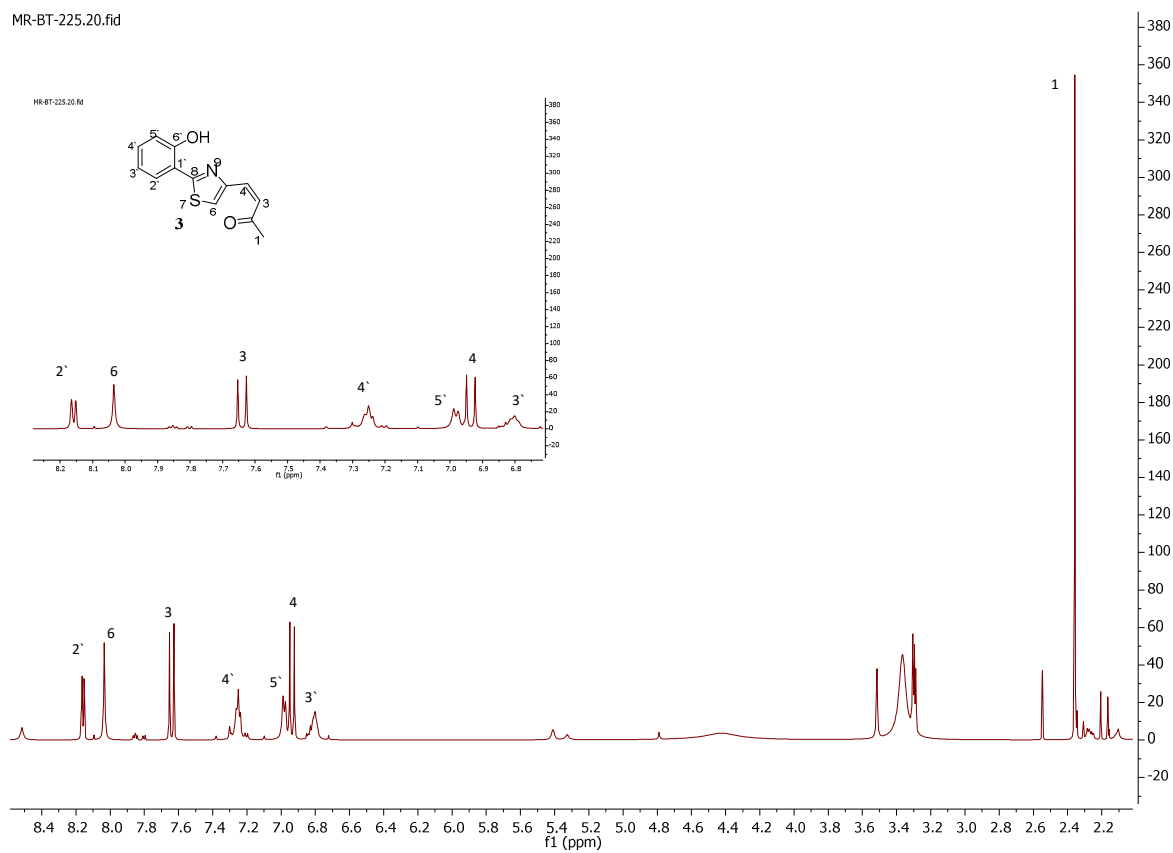

Figure S13. <sup>1</sup>H NMR spectrum of compound 3.

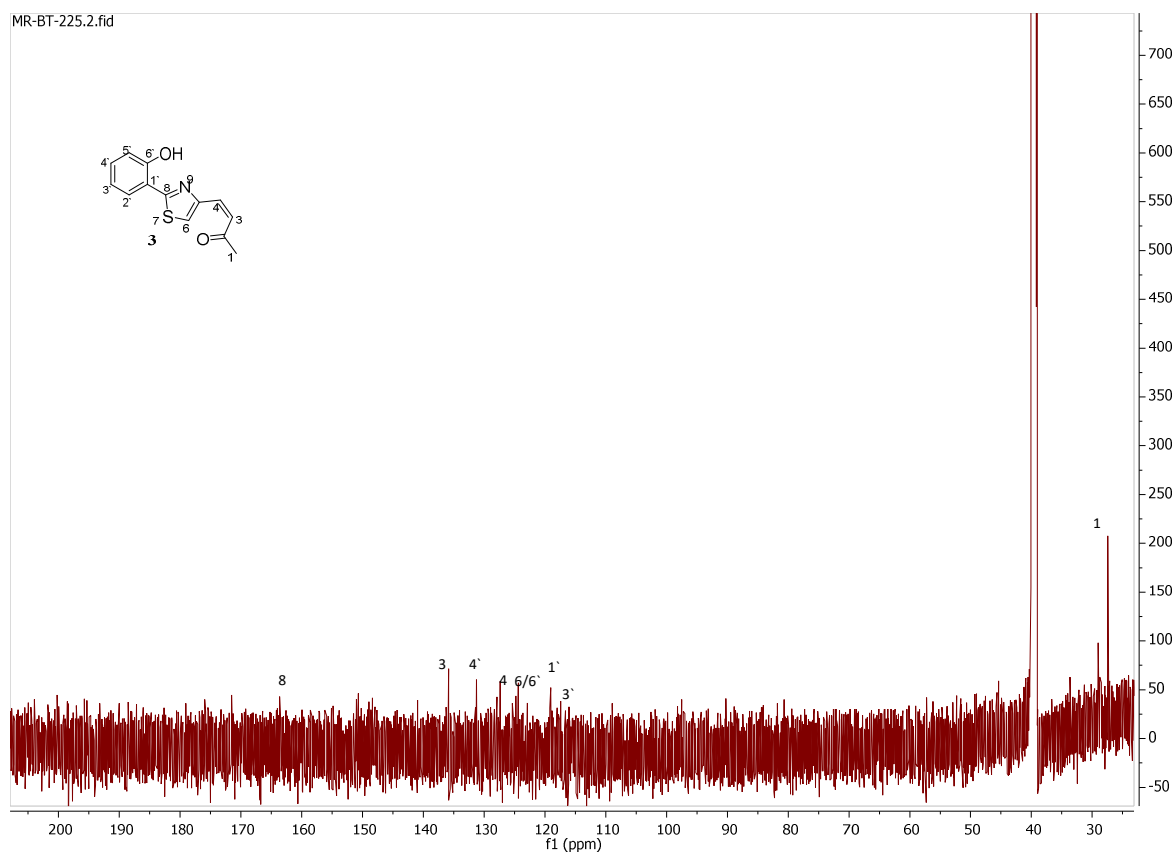

Figure S14.  $^{13}\text{C}$  NMR spectrum of compound 3.

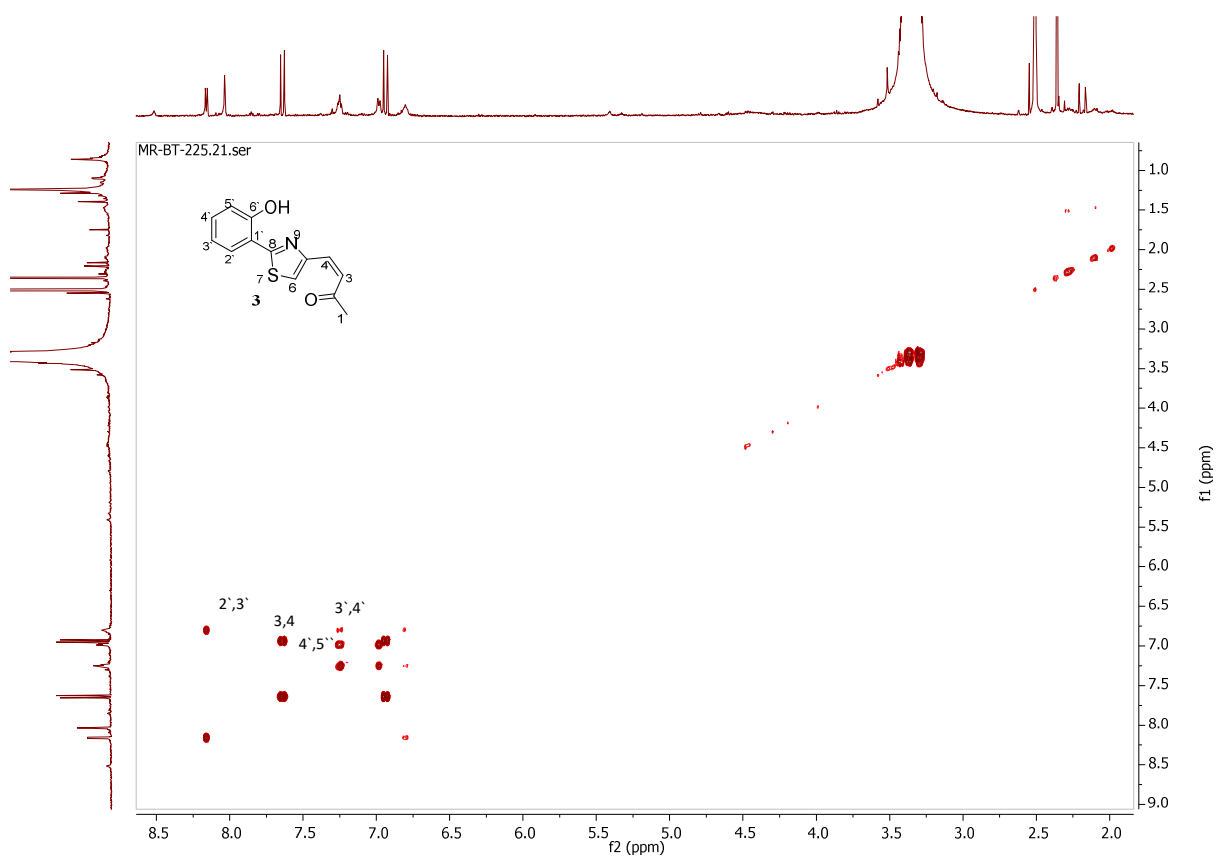

Figure S15. COSY spectrum of compound 3.



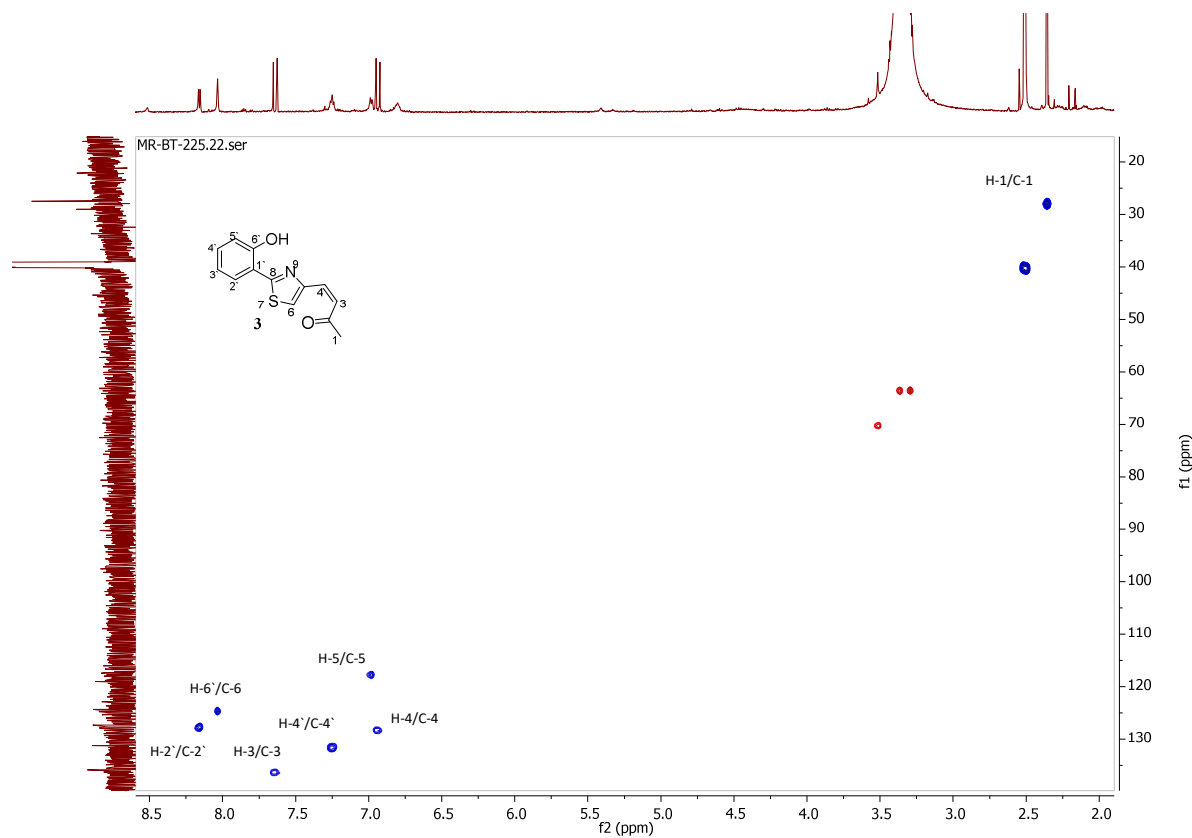

Figure S16. HSQC spectrum of compound 3.

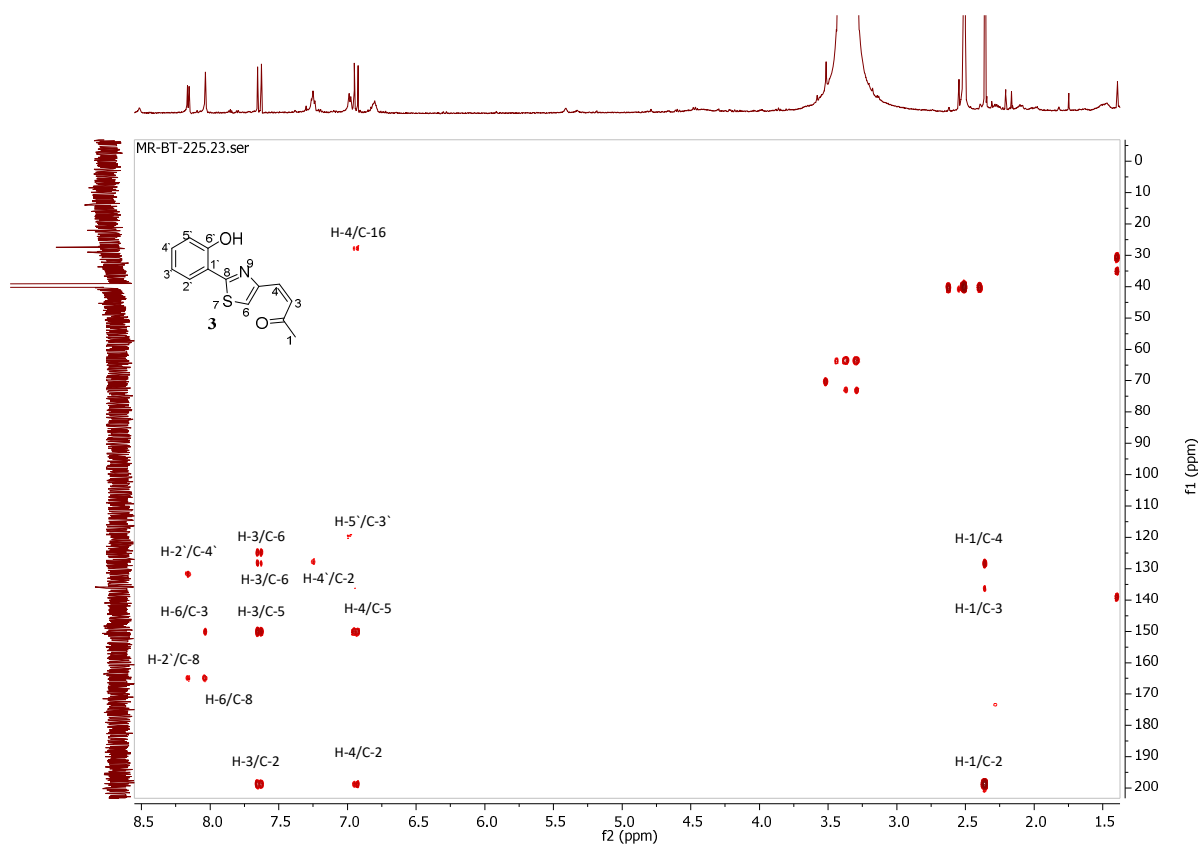

Figure S17. HMBC spectrum of compound 3.

MR485 #1505 RT: 13.14 AV: 1 NL: 2.20E5  
F: FTMS + p ESI Full ms [230.00-2000.00]

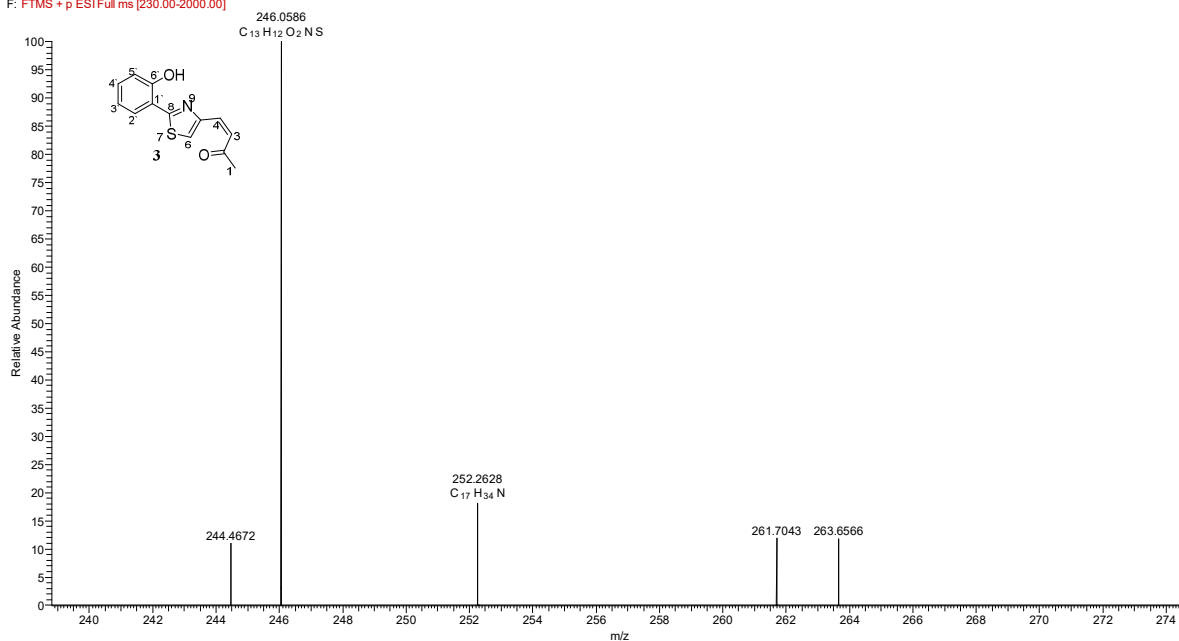

Figure S18. HRMS of compound 3.

Pulicatin cpd 2  
single\_pulse

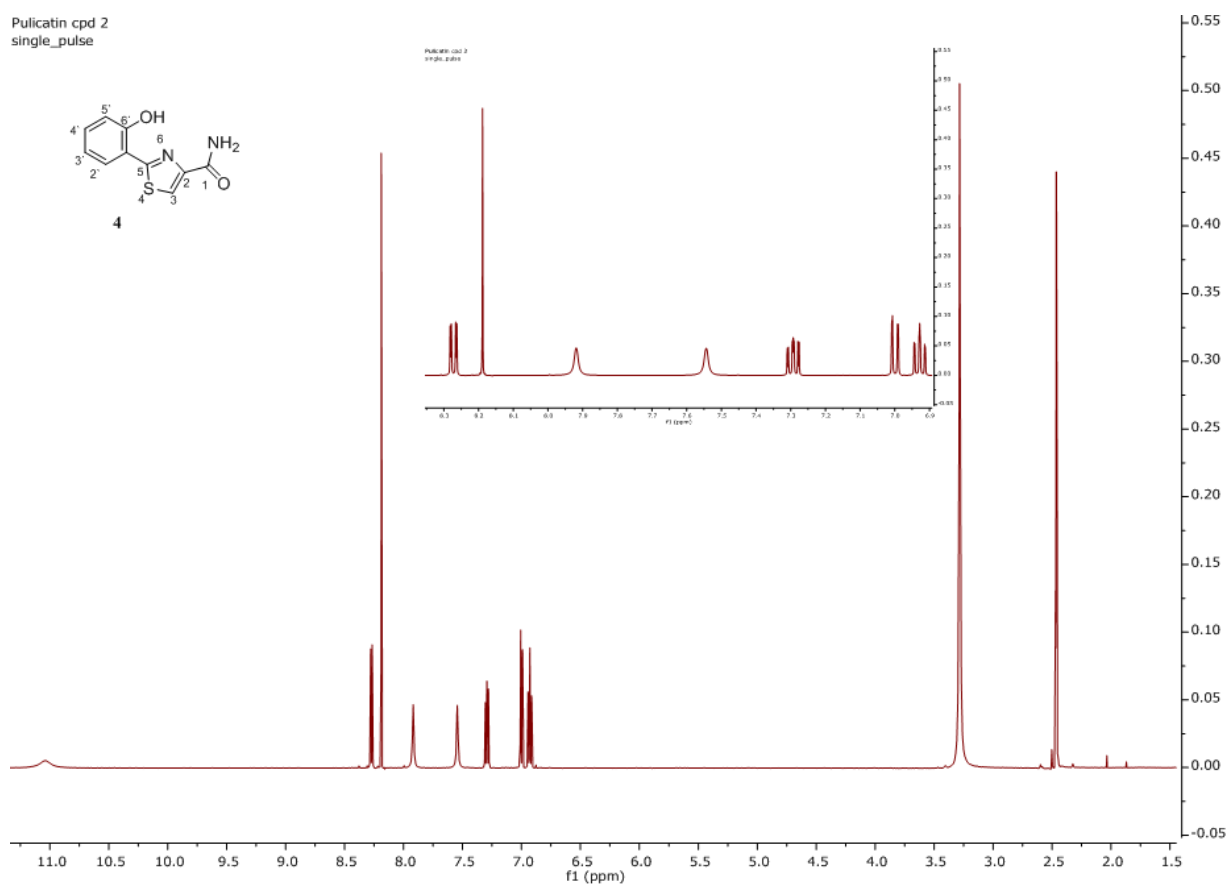

Figure S19. <sup>1</sup>H NMR spectrum of compound 4.

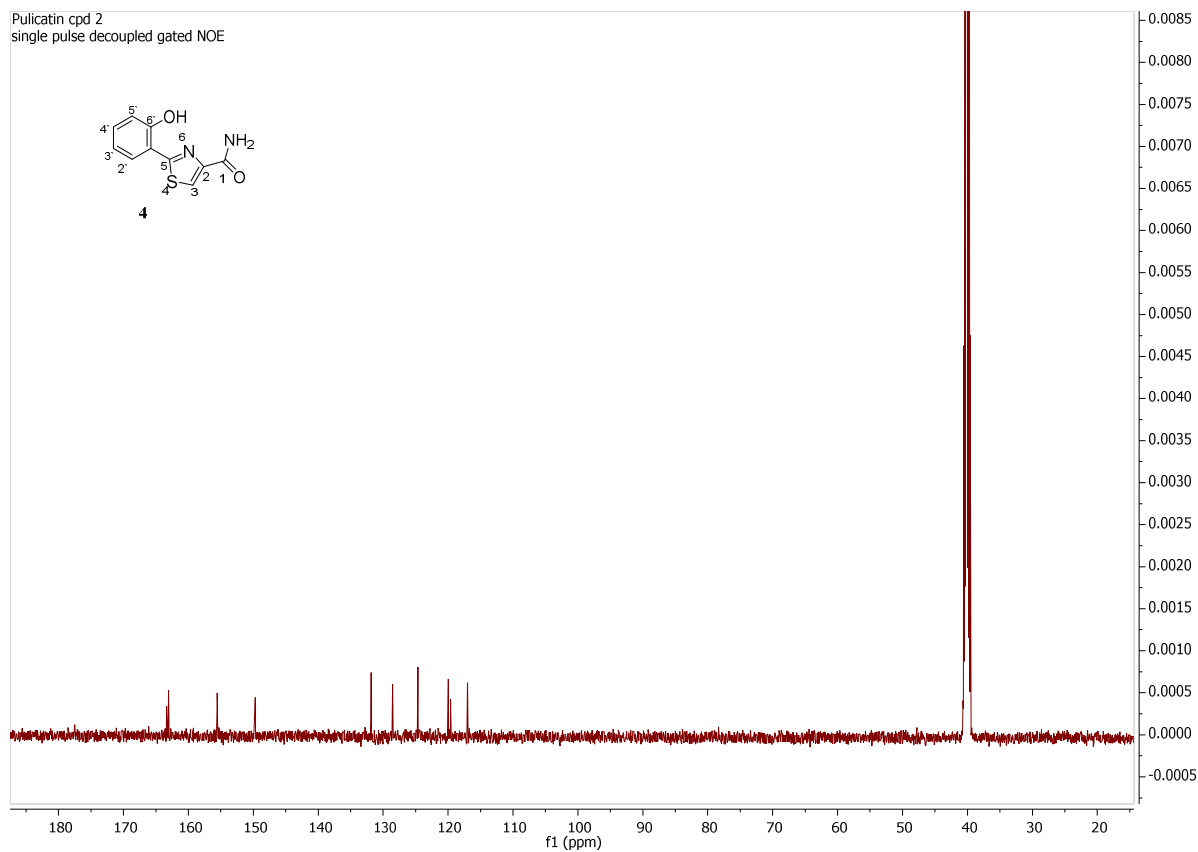

Figure S20.  $^{13}\text{C}$  NMR spectrum of compound 4.

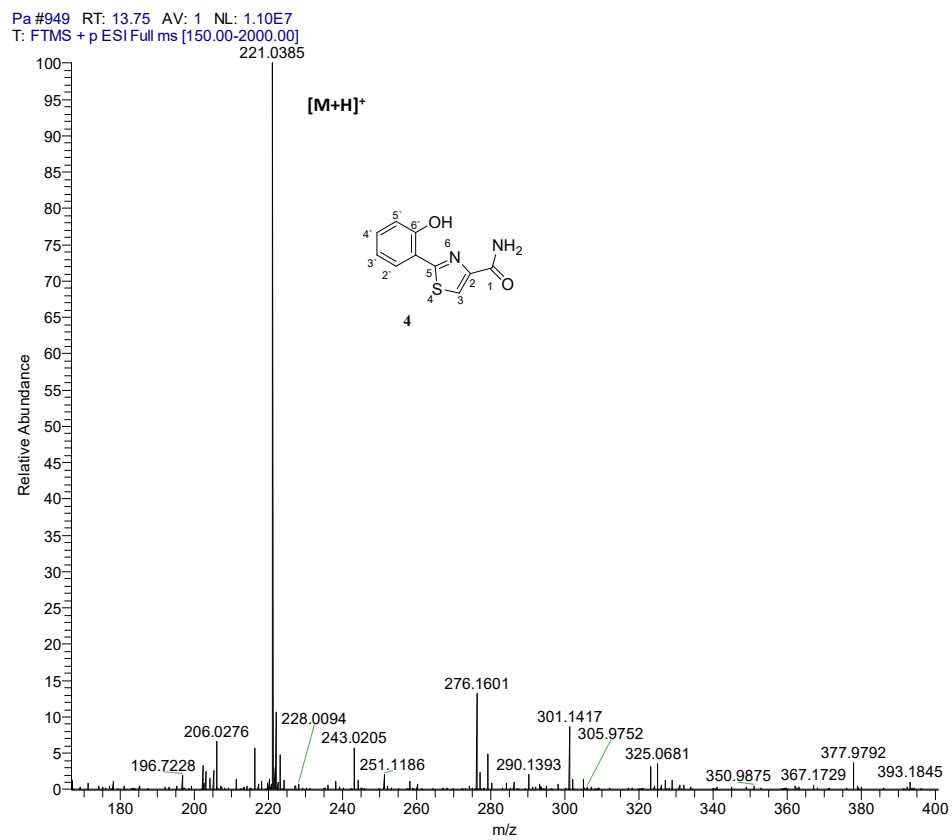

Figure S21. HRMS of compound 4.
